# Supplementary material for: Impaired mitophagy links mitochondrial disease to epithelial stress in methylmalonyl-CoA mutase deficiency
Source: PubMed Central journal article supplement (PMC7033137; doi:10.1038/s41467-020-14729-8), 2020-02-20
Supplement: 41467_2020_14729_MOESM2_ESM.pdf [file 41467_2020_14729_MOESM2_ESM.pdf]

## **Description of Additional Supplementary Files**

File Name: Supplementary Data 1

Description: Full list of probe set annotations corresponding to genes differently expressed between control and MMA patient-derived kidney cells. The up and downregulated genes are highlighted in red and in green, respectively
