# Supplementary material for: Impaired mitophagy links mitochondrial disease to epithelial stress in methylmalonyl-CoA mutase deficiency
Source: PubMed Central journal article supplement (PMC7033137; doi:10.1038/s41467-020-14729-8), 2020-02-20
Supplement: 41467_2020_14729_MOESM4_ESM.pdf [file 41467_2020_14729_MOESM4_ESM.pdf]

## Reporting Summary

Nature Research wishes to improve the reproducibility of the work that we publish. This form provides structure for consistency and transparency in reporting. For further information on Nature Research policies, see [Authors & Referees](#) and the [Editorial Policy Checklist](#).

### Statistics

For all statistical analyses, confirm that the following items are present in the figure legend, table legend, main text, or Methods section.

n/a Confirmed

- |                                     |                                     |                                                                                                                                                                                                                                                            |
|-------------------------------------|-------------------------------------|------------------------------------------------------------------------------------------------------------------------------------------------------------------------------------------------------------------------------------------------------------|
| <input type="checkbox"/>            | <input checked="" type="checkbox"/> | The exact sample size ( $n$ ) for each experimental group/condition, given as a discrete number and unit of measurement                                                                                                                                    |
| <input type="checkbox"/>            | <input checked="" type="checkbox"/> | A statement on whether measurements were taken from distinct samples or whether the same sample was measured repeatedly                                                                                                                                    |
| <input type="checkbox"/>            | <input checked="" type="checkbox"/> | The statistical test(s) used AND whether they are one- or two-sided<br><i>Only common tests should be described solely by name; describe more complex techniques in the Methods section.</i>                                                               |
| <input checked="" type="checkbox"/> | <input type="checkbox"/>            | A description of all covariates tested                                                                                                                                                                                                                     |
| <input type="checkbox"/>            | <input checked="" type="checkbox"/> | A description of any assumptions or corrections, such as tests of normality and adjustment for multiple comparisons                                                                                                                                        |
| <input type="checkbox"/>            | <input checked="" type="checkbox"/> | A full description of the statistical parameters including central tendency (e.g. means) or other basic estimates (e.g. regression coefficient) AND variation (e.g. standard deviation) or associated estimates of uncertainty (e.g. confidence intervals) |
| <input type="checkbox"/>            | <input checked="" type="checkbox"/> | For null hypothesis testing, the test statistic (e.g. $F$ , $t$ , $r$ ) with confidence intervals, effect sizes, degrees of freedom and $P$ value noted<br><i>Give <math>P</math> values as exact values whenever suitable.</i>                            |
| <input checked="" type="checkbox"/> | <input type="checkbox"/>            | For Bayesian analysis, information on the choice of priors and Markov chain Monte Carlo settings                                                                                                                                                           |
| <input checked="" type="checkbox"/> | <input type="checkbox"/>            | For hierarchical and complex designs, identification of the appropriate level for tests and full reporting of outcomes                                                                                                                                     |
| <input checked="" type="checkbox"/> | <input type="checkbox"/>            | Estimates of effect sizes (e.g. Cohen's $d$ , Pearson's $r$ ), indicating how they were calculated                                                                                                                                                         |

*Our web collection on [statistics for biologists](#) contains articles on many of the points above.*

### Software and code

Policy information about [availability of computer code](#)

Data collection

Data analysis

For manuscripts utilizing custom algorithms or software that are central to the research but not yet described in published literature, software must be made available to editors/reviewers. We strongly encourage code deposition in a community repository (e.g. GitHub). See the Nature Research [guidelines for submitting code & software](#) for further information.

### Data

Policy information about [availability of data](#)

All manuscripts must include a [data availability statement](#). This statement should provide the following information, where applicable:

- Accession codes, unique identifiers, or web links for publicly available datasets
- A list of figures that have associated raw data
- A description of any restrictions on data availability

All uncropped immunoblots associated with Figures. 1a, 2a, 2g, 4a, 4d, 4e, 5a, 6e, 7b, 7h, 8d, 8g and Supplementary Figures. 1b, 2e, 3j, 5c, 5f, 6a, 7a, 7c, 7f, 8d, 9d, 8h, 10d are shown in Supplementary Figure 13. Source data underlying the figures 1-9 and Supplementary Figures 1-11 are provided as a Source Data file. Microarray data that support the findings of this study are provided in Supplementary Table 2 and have been deposited in NCBI Gene Expression Omnibus (GEO) with accession number GSE120683. Additional data supporting the findings of this study are available from corresponding author on reasonable request.

## Field-specific reporting

Please select the one below that is the best fit for your research. If you are not sure, read the appropriate sections before making your selection.

- Life sciences     Behavioural & social sciences     Ecological, evolutionary & environmental sciences

For a reference copy of the document with all sections, see [nature.com/documents/nr-reporting-summary-flat.pdf](https://www.nature.com/documents/nr-reporting-summary-flat.pdf)

## Life sciences study design

All studies must disclose on these points even when the disclosure is negative.

|                 |                                                                                                                                                                                                     |
|-----------------|-----------------------------------------------------------------------------------------------------------------------------------------------------------------------------------------------------|
| Sample size     | No statistical methods were used to predetermine the sample size. The sample size was selected based on commonly adopted standards in the field, resulting in statistically meaningful comparisons. |
| Data exclusions | No data were excluded from the analysis.                                                                                                                                                            |
| Replication     | Experiments in Figure 9c were performed once. All of the experiments reported here in this study were independently performed two to three times or more as indicated in the legends.               |
| Randomization   | No randomization was applied                                                                                                                                                                        |
| Blinding        | The investigators were not blinded to allocation during the experiments and outcome assessment.                                                                                                     |

## Reporting for specific materials, systems and methods

We require information from authors about some types of materials, experimental systems and methods used in many studies. Here, indicate whether each material, system or method listed is relevant to your study. If you are not sure if a list item applies to your research, read the appropriate section before selecting a response.

### Materials & experimental systems

| n/a                                 | Involvement in the study                                        |
|-------------------------------------|-----------------------------------------------------------------|
| <input type="checkbox"/>            | <input type="checkbox"/> Antibodies                             |
| <input type="checkbox"/>            | <input checked="" type="checkbox"/> Eukaryotic cell lines       |
| <input checked="" type="checkbox"/> | <input type="checkbox"/> Palaeontology                          |
| <input type="checkbox"/>            | <input checked="" type="checkbox"/> Animals and other organisms |
| <input type="checkbox"/>            | <input checked="" type="checkbox"/> Human research participants |
| <input checked="" type="checkbox"/> | <input type="checkbox"/> Clinical data                          |

### Methods

| n/a                                 | Involvement in the study                        |
|-------------------------------------|-------------------------------------------------|
| <input checked="" type="checkbox"/> | <input type="checkbox"/> ChIP-seq               |
| <input checked="" type="checkbox"/> | <input type="checkbox"/> Flow cytometry         |
| <input checked="" type="checkbox"/> | <input type="checkbox"/> MRI-based neuroimaging |

## Antibodies

|                 |                                                                                                                                                                                                                                          |
|-----------------|------------------------------------------------------------------------------------------------------------------------------------------------------------------------------------------------------------------------------------------|
| Antibodies used | All antibodies used in this study are listed in methods sections                                                                                                                                                                         |
| Validation      | All antibodies used in our study have been previously characterized and validated by biological strategies. Detailed information can be found on the website from manufactures. This information has been listed in the methods section. |

## Eukaryotic cell lines

Policy information about [cell lines](#)

|                     |                                                                                                                                                                                                                                                                                                                                                                                                                                                                                                                                                                                                                                                                                |
|---------------------|--------------------------------------------------------------------------------------------------------------------------------------------------------------------------------------------------------------------------------------------------------------------------------------------------------------------------------------------------------------------------------------------------------------------------------------------------------------------------------------------------------------------------------------------------------------------------------------------------------------------------------------------------------------------------------|
| Cell line source(s) | Kidney cells from healthy donors and from patients with MMA were provided by Dr. Stefan Koelker (Division of Inherited Metabolic Diseases, University Children's Hospital Heidelberg).<br>Primary cultures of micro-dissected proximal tubules derived from mouse kidneys were developed in the Devuyt lab at Institute of Physiology, University of Zurich.<br>CRISPR/Cas9-mediated PRKN2 (HZGHC003208c002) and PINK1 (HZGHC000798c008) knockout (KO) cell line were generated and purchased from Horizon Discovery ( <a href="http://www.horizondiscovery.com">www.horizondiscovery.com</a> ).<br>HeLa cell line was kindly provided by Dr. L. Borsig, University of Zurich. |
| Authentication      | The control and patient cells were authenticated by their genotype and by measuring the levels of methylmalonic acid (MA) and the amount of MMUT protein and its enzyme activity.<br>Primary proximal tubule cells were authenticated by their gene profile and by assessing their specialized functions such as endocytic uptake of albumin and transferrin ligands.<br>PRK2 and PINK1 KO cells were subjected to PCR analysis, followed by Sanger sequencing to identify CRISPR-Cas9 induced-deletion.                                                                                                                                                                       |

## Mycoplasma contamination

All cell lines were routinely tested for mycoplasma using a commercial kit (Lonza) and verified as mycoplasma-negative.

Commonly misidentified lines  
(See [ICLAC](#) register)

The cells lines used here do not appear in the database of commonly misidentified cell lines (International Cell Line Authentication Committee), except the HeLa cell line that was analysed as negative control for the detection of Parkin expression in Supplementary Figure 7f.

## Animals and other organisms

Policy information about [studies involving animals](#); [ARRIVE guidelines](#) recommended for reporting animal research

## Laboratory animals

The mice (C57BL/6 background) bearing floxed Cox10 (Cox10 fl/fl) alleles, in which the exon 6 is flanked by two loxP sequences, were kindly provided by Dr. Moraes (Department of Neurology, University of Miami).  
The mice (C57BL/6 background) bearing floxed Atg7 (Atg7 fl/fl) alleles were kindly provided by the RIKEN BRC through the National–Bio–Resource Project of the MEXT, Japan.  
The mice (C57BL/6 background) bearing germline Prkn2 and Pink1 knockout were purchased from Jackson Laboratory.  
The mice (C57BL/6 background) bearing Mut floxed allele, in which exon 3 of the Mut gene is flanked by 2 loxP sequences, or carrying M698K point mutation in the Mut gene were generated and purchased from Polygene (Switzerland).  
mut-KO zebrafish larvae (TL/TU background) were generated in Devuyt lab at the Institute of Physiology, University of Zurich, Switzerland.

## Wild animals

No wild animals were involved in this study.

## Field-collected samples

This study did not involve samples collected from the field.

## Ethics oversight

Animal care and experimental procedures were approved by the institutional animal care and use committee at Canton Zurich in accordance with the ethical guidelines existing at University of Zurich, Switzerland.

Note that full information on the approval of the study protocol must also be provided in the manuscript.

## Human research participants

Policy information about [studies involving human research participants](#)

## Population characteristics

Human kidney biopsies were obtained from a patient with clinical diagnosis of MMA and from a healthy control (non-transplanted, normal human kidney) who had given consent to tissue utilization for research purpose.

## Recruitment

There were no recruitment biases that impact the results of our analyses.

## Ethics oversight

Informed consent was obtained, and the use of the human biopsy samples was in accordance with the ethical regulations at Bambino Gesù Children's Hospital and approved by the EUREnOmics consortium (FP7, 2007–2013, grant agreement no. 305608) and by the institutional review board at Bambino Gesù Children's Hospital.

Note that full information on the approval of the study protocol must also be provided in the manuscript.
